# Supplementary material for: Comparing research and development, launch, and scale up timelines of 18 vaccines: lessons learnt from COVID-19 and implications for other infectious diseases
Source: PubMed Central journal article supplement (PMC10496705; doi:10.1136/bmjgh-2023-012855), 2023-09-11
Supplement: bmjgh-2023-012855supp001.pdf [file bmjgh-2023-012855supp001.pdf]

## Appendix 1

Table S1. Milestone dates, sources, and links for each vaccine included in the analysis

| Vaccine                 | Ideation   |                                                                                                                                |                                                                                                                                                                                                                                                       | First regulatory approval |                                                                                                                                                                                              |                                                                                                                                                                                                                                                                                                             | First in-country launch |                                                                                                                |                                                                                                                                                                                                                                                             | Global uptake of intervention at 20% |        |                |
|-------------------------|------------|--------------------------------------------------------------------------------------------------------------------------------|-------------------------------------------------------------------------------------------------------------------------------------------------------------------------------------------------------------------------------------------------------|---------------------------|----------------------------------------------------------------------------------------------------------------------------------------------------------------------------------------------|-------------------------------------------------------------------------------------------------------------------------------------------------------------------------------------------------------------------------------------------------------------------------------------------------------------|-------------------------|----------------------------------------------------------------------------------------------------------------|-------------------------------------------------------------------------------------------------------------------------------------------------------------------------------------------------------------------------------------------------------------|--------------------------------------|--------|----------------|
|                         | Date       | Source                                                                                                                         | Link to source                                                                                                                                                                                                                                        | Date                      | Source                                                                                                                                                                                       | Link to source                                                                                                                                                                                                                                                                                              | Date                    | Source                                                                                                         | Link to source                                                                                                                                                                                                                                              | Date                                 | Source | Link to source |
| Bharat Biotech_CO VAXIN | 2020-06-29 | CNBC-TV18. (2020, June 29). India's first COVID-19 vaccine candidate COVAXIN gets DCGI approval; human trials to begin in July | <a href="https://www.cnbctv18.com/health-care/indias-first-covid-19-vaccine-candidate-covaxin-gets-dcgi-approval-6226931.htm">https://www.cnbctv18.com/health-care/indias-first-covid-19-vaccine-candidate-covaxin-gets-dcgi-approval-6226931.htm</a> | 2021-01-03                | Press Information Bureau Government of India. (2021, January 3). Press Statement by the Drugs Controller General of India (DCGI) on Restricted Emergency approval of COVID-19 virus vaccine. | <a href="https://vaccine.icmr.org.in/images/pdf/HFW-DCGI-authorisation-3rdJanuary.pdf">https://vaccine.icmr.org.in/images/pdf/HFW-DCGI-authorisation-3rdJanuary.pdf</a>                                                                                                                                     | 2021-01-16              | Ellis-Petersen, H. (2021, January 16). India begins world's biggest Covid vaccination programme. The Guardian. | <a href="https://www.theguardian.com/world/2021/jan/16/india-begins-worlds-biggest-covid-vaccination-programme">https://www.theguardian.com/world/2021/jan/16/india-begins-worlds-biggest-covid-vaccination-programme</a>                                   | #N/A                                 | #N/A   | #N/A           |
| CanSino_Ad5-nCoV        | 2020-01-20 | CanSino Biologics. (n.d.). Our Fight Against Covid-19, Timeline.                                                               | <a href="http://www.cansinotech.com/html/1/156/218/index.html">http://www.cansinotech.com/html/1/156/218/index.html</a>                                                                                                                               | 2021-02-10                | Drazen Jorgic. Reuters. 2/10/2021. Mexico approves China's CanSino and Sinovac COVID-19 vaccines.                                                                                            | <a href="https://www.reuters.com/article/us-health-coronavirus-mexico-cansino/mexico-approves-chinas-cansino-and-sinovac-covid-19-vaccines-idUSKBN2A12W">https://www.reuters.com/article/us-health-coronavirus-mexico-cansino/mexico-approves-chinas-cansino-and-sinovac-covid-19-vaccines-idUSKBN2A12W</a> | 2021-02-26              | PTI. (2021, February 28). China rolls out first one-jab Covid-19 vaccine: Report. Economic Times, Healthworld. | <a href="https://health.economictimes.indiatimes.com/news/pharma/china-rolls-out-first-one-jab-covid-19-vaccine-report/81257865">https://health.economictimes.indiatimes.com/news/pharma/china-rolls-out-first-one-jab-covid-19-vaccine-report/81257865</a> | #N/A                                 | #N/A   | #N/A           |

|                           |            |                                                                                                                                                                                                         |                                                                                                                                                                                                               |            |                                                                                                      |                                                                                                                                                                                                                         |            |                                                                                                                                           |                                                                                                                                                                                                                       |            |                                                 |                                                                                                                                   |
|---------------------------|------------|---------------------------------------------------------------------------------------------------------------------------------------------------------------------------------------------------------|---------------------------------------------------------------------------------------------------------------------------------------------------------------------------------------------------------------|------------|------------------------------------------------------------------------------------------------------|-------------------------------------------------------------------------------------------------------------------------------------------------------------------------------------------------------------------------|------------|-------------------------------------------------------------------------------------------------------------------------------------------|-----------------------------------------------------------------------------------------------------------------------------------------------------------------------------------------------------------------------|------------|-------------------------------------------------|-----------------------------------------------------------------------------------------------------------------------------------|
| Gamaleya_Sputnik V        | 2020-06-10 | Russian Direct Investment Fund. (2020, June 10). RDIF, Sistema and the Gamaleya National Research Institute of Epidemiology and Microbiology agree on production of Russia's first coronavirus vaccine. | <a href="https://rdif.ru/Eng_full_News/5326/">https://rdif.ru/Eng_full_News/5326/</a>                                                                                                                         | 2020-11-08 | NF Gamaleya NITsEM "of the Ministry of Health of Russia                                              | <a href="https://grls.rosminzdrav.ru/Grls_View_v2.aspx?routingGuid=6c1f7501-7067-45b3-a56d-95e25db89e97&amp;t">https://grls.rosminzdrav.ru/Grls_View_v2.aspx?routingGuid=6c1f7501-7067-45b3-a56d-95e25db89e97&amp;t</a> | 2020-12-29 | Litvinova, D. & Calatrava, A. (2020, December 29). Belarus, Argentina start vaccinations with Russian shots. ABC News.                    | <a href="https://abcnews.go.com/Health/wireStory/belarus-starts-covid-19-vaccinations-russian-shots-74945827">https://abcnews.go.com/Health/wireStory/belarus-starts-covid-19-vaccinations-russian-shots-74945827</a> | #N/A       | #N/A                                            | #N/A                                                                                                                              |
| Janssen (J&J)_Ad26.COV2.S | 2020-03-30 | Gorsky, A. (2020, March 30). "I Have Never Seen a Moment So Rich in Collaboration, Ingenuity and Acts of Bravery": Johnson & Johnson Announces It Has Identified a Lead COVID-19 Vaccine Candidate.     | <a href="https://www.jnj.com/latest-news/johnson-ceo-alex-gorsky-announces-coronavirus-vaccine-candidate">https://www.jnj.com/latest-news/johnson-ceo-alex-gorsky-announces-coronavirus-vaccine-candidate</a> | 2021-02-27 | Hinton, D. (2021, June 10). Janssen COVID-19 Vaccine EUA Letter of Authorization 06102021. FDA Memo. | <a href="https://www.fda.gov/media/146303/download">https://www.fda.gov/media/146303/download</a>                                                                                                                       | 2021-02-17 | South Africa Government News Agency. (2021, February 18). Everything you need to know about the Johnson & Johnson vaccine. SAnews.gov.za. | <a href="https://www.sanews.gov.za/south-africa/everything-you-need-know-about-johnson-johnson-vaccine">https://www.sanews.gov.za/south-africa/everything-you-need-know-about-johnson-johnson-vaccine</a>             | 2021-05-21 | Launch and Scale Speedometer: Vaccine Purchases | <a href="https://launchandscalefast.org/COVID-19/vaccine-purchases">https://launchandscalefast.org/COVID-19/vaccine-purchases</a> |
| Moderna (Spikevax)        | 2020-01-13 | Moderna. (2020, November 16) COVID-19 vaccine                                                                                                                                                           | <a href="https://www.moderna.com/sites/default/files/content">https://www.moderna.com/sites/default/files/content</a>                                                                                         | 2020-12-18 | Hinton, D. (FDA). (2021, July 7). Moderna                                                            | <a href="https://www.fda.gov/media/144636/download">https://www.fda.gov/media/144636/download</a>                                                                                                                       | 2020-12-20 | Reed, M., (2020, December 22). First Moderna                                                                                              | <a href="https://www.wcvb.com/article/first-moderna">https://www.wcvb.com/article/first-moderna</a>                                                                                                                   | 2021-12-10 | Launch and Scale Speedometer: Vaccine Purchases | <a href="https://launchandscalefast.org/COVID-19/vaccine-purchases">https://launchandscalefast.org/COVID-19/vaccine-purchases</a> |

|                               |            |                                                                                                        |                                                                                                                                                                                                       |            |                                                                                                                                       |                                                                                                                                                                                                                                                                                                                                 |            |                                                                                                                                                                                                                                      |                                                                                                                                                                                                                                                         |            |                                                 |                                                                                                                                   |
|-------------------------------|------------|--------------------------------------------------------------------------------------------------------|-------------------------------------------------------------------------------------------------------------------------------------------------------------------------------------------------------|------------|---------------------------------------------------------------------------------------------------------------------------------------|---------------------------------------------------------------------------------------------------------------------------------------------------------------------------------------------------------------------------------------------------------------------------------------------------------------------------------|------------|--------------------------------------------------------------------------------------------------------------------------------------------------------------------------------------------------------------------------------------|---------------------------------------------------------------------------------------------------------------------------------------------------------------------------------------------------------------------------------------------------------|------------|-------------------------------------------------|-----------------------------------------------------------------------------------------------------------------------------------|
|                               |            | (mRNA-1273) Last program update: November 16, 2020.                                                    | <a href="#">document s/mRNA-1273-Update-11-16-20-Final.pdf</a>                                                                                                                                        |            | COVID-19 Vaccine EUA Letter of Authorization 07072021. FDA.                                                                           |                                                                                                                                                                                                                                                                                                                                 |            | COVID-19 vaccines given. WCVB Boston.                                                                                                                                                                                                | <a href="#">covid-19-vaccines-given/35042711</a>                                                                                                                                                                                                        |            |                                                 | <a href="#">19/vaccine-purchases</a>                                                                                              |
| Novavax_N VX-CoV2373          | 2020-02-26 | Novavax.inc press office. (2020, February 26). Novavax Advances Development of Novel COVID-19 Vaccine. | <a href="https://ir.novavax.com/2020-02-26-Novavax-Advances-Development-of-Novel-COVID-19-Vaccine">https://ir.novavax.com/2020-02-26-Novavax-Advances-Development-of-Novel-COVID-19-Vaccine</a>       | 2021-11-01 | Australian Government. TGA provisionally approves Novavax (Bioelect Pty Ltd's) COVID-19 vaccine NUVAXOVID                             | <a href="https://www.tga.gov.au/media-release/tga-provisionally-approves-novavax-bioelect-pty-ltds-covid-19-vaccine-nuvaxovid">https://www.tga.gov.au/media-release/tga-provisionally-approves-novavax-bioelect-pty-ltds-covid-19-vaccine-nuvaxovid</a>                                                                         | 2021-11-01 | Australian Government. TGA provisionally approves Novavax (Bioelect Pty Ltd's) COVID-19 vaccine NUVAXOVID                                                                                                                            | <a href="https://www.tga.gov.au/media-release/tga-provisionally-approves-novavax-bioelect-pty-ltds-covid-19-vaccine-nuvaxovid">https://www.tga.gov.au/media-release/tga-provisionally-approves-novavax-bioelect-pty-ltds-covid-19-vaccine-nuvaxovid</a> | 2021-05-06 | Launch and Scale Speedometer: Vaccine Purchases | <a href="https://launchandscalefast.org/COVID-19/vaccine-purchases">https://launchandscalefast.org/COVID-19/vaccine-purchases</a> |
| Oxford-AstraZeneca_AZD1222_AZ | 2020-02-07 | The Jenner Institute. (7-Feb-20). Novel Coronavirus vaccine manufacturing contract signed.             | <a href="https://www.jenner.ac.uk/about/news/novel-coronavirus-vaccine-manufacturing-contract-signed">https://www.jenner.ac.uk/about/news/novel-coronavirus-vaccine-manufacturing-contract-signed</a> | 2020-12-30 | Aislinn Laing - Reuters (2020, December 30). Argentine regulator approves AstraZeneca/Oxford COVID-19 vaccine - AstraZeneca. Reuters. | <a href="https://www.reuters.com/article/us-health-coronavirus-argentina-astazenec-regulator-approves-astazeneca-oxford-covid-19-vaccine-astazeneca-idUSKBN29421P">https://www.reuters.com/article/us-health-coronavirus-argentina-astazenec-regulator-approves-astazeneca-oxford-covid-19-vaccine-astazeneca-idUSKBN29421P</a> | 2021-01-16 | Aleem, M. A. (2021, March 19). Rapid Response: Re: Covid-19: WHO says rollout of AstraZeneca vaccine should continue, as Europe divides over safety. <a href="https://doi.org/10.1136/bmj.n728">https://doi.org/10.1136/bmj.n728</a> | <a href="https://www.bmi.com/content/372/bmi.n728/r-1">https://www.bmi.com/content/372/bmi.n728/r-1</a>                                                                                                                                                 | #N/A       | #N/A                                            | #N/A                                                                                                                              |
| Pfizer-BioNTech_BNT162        | 2020-01-10 | Polack, F. P., Thomas, S. J., Kitchin, N., et al C4591001 Clinical Trial Group                         | <a href="https://www.nejm.org/doi/full/10.1056/NEJMoa2034577">https://www.nejm.org/doi/full/10.1056/NEJMoa2034577</a>                                                                                 | 2020-12-02 | U.S. Food & Drug Administration (2021, August, 23). FDA Approves                                                                      | <a href="https://www.fda.gov/news-events/press-announcements/fda-approves">https://www.fda.gov/news-events/press-announcements/fda-approves</a>                                                                                                                                                                                 | 2020-12-24 | AP News staff. (2020, December 24). Mexico starts giving first shots of Pfizer-                                                                                                                                                      | <a href="https://apnews.com/article/mexico-coronavirus-pandemic-coronavirus">https://apnews.com/article/mexico-coronavirus-pandemic-coronavirus</a>                                                                                                     | 2021-11-29 | Launch and Scale Speedometer: Vaccine Purchases | <a href="https://launchandscalefast.org/COVID-19/vaccine-purchases">https://launchandscalefast.org/COVID-19/vaccine-purchases</a> |

|                      |            |                                                                                                                                                                                                                       |                                                                                                                                                                               |            |                                                                                                                                                           |                                                                                                                                                                                                                                                 |            |                                                                                                                             |                                                                                                                                                                                                                               |            |                                                 |                                                                                                                                   |
|----------------------|------------|-----------------------------------------------------------------------------------------------------------------------------------------------------------------------------------------------------------------------|-------------------------------------------------------------------------------------------------------------------------------------------------------------------------------|------------|-----------------------------------------------------------------------------------------------------------------------------------------------------------|-------------------------------------------------------------------------------------------------------------------------------------------------------------------------------------------------------------------------------------------------|------------|-----------------------------------------------------------------------------------------------------------------------------|-------------------------------------------------------------------------------------------------------------------------------------------------------------------------------------------------------------------------------|------------|-------------------------------------------------|-----------------------------------------------------------------------------------------------------------------------------------|
|                      |            | (2020). Safety and Efficacy of the BNT162b2 mRNA Covid-19 Vaccine. The New England journal of medicine, 383(27), 2603–2615. <a href="https://doi.org/10.1056/NEJMoa2034577">https://doi.org/10.1056/NEJMoa2034577</a> |                                                                                                                                                                               |            | First COVID-19 Vaccine. FDA News Release.                                                                                                                 | <a href="#">approves-first-covid-19-vaccine</a>                                                                                                                                                                                                 |            | BioNtech vaccine. AP News.                                                                                                  | <a href="#">-vaccine-mexico-city-16105a31023e7ff1cdb7893b452e2906</a>                                                                                                                                                         |            |                                                 |                                                                                                                                   |
| Sinopharm_SARS-CoV-2 | 2020-01-01 | Corum, J. & Zimmer, C. (2021, May 7). How the Sinopharm Vaccine Works. The New York Times.                                                                                                                            | <a href="https://www.nytimes.com/interactive/2020/health/sinopharm-covid-19-vaccine.html">https://www.nytimes.com/interactive/2020/health/sinopharm-covid-19-vaccine.html</a> | 2020-06-24 | Zhuang, P. (2020, September 25). Coronavirus : WHO backed China's emergency use of experimental vaccines, health official says. South China Morning Post. | <a href="https://www.scmp.com/news/china/society/article/3103121/coronavirus-who-backed-chinas-emergency-use-experimental">https://www.scmp.com/news/china/society/article/3103121/coronavirus-who-backed-chinas-emergency-use-experimental</a> | 2020-07-16 | Wee, S. & Simões M. (2020, July 16). In Coronavirus Vaccine Race, China Strays From the Official Paths. The New York Times. | <a href="https://www.nytimes.com/2020/07/16/business/china-vaccine-coronavirus.html">https://www.nytimes.com/2020/07/16/business/china-vaccine-coronavirus.html</a>                                                           | #N/A       | #N/A                                            | #N/A                                                                                                                              |
| Sinovac_Coronavac    | 2020-01-01 | Sinovac. (2020, April 14). Sinovac Announces Approval of Human Clinical Trial for a Vaccine Candidate                                                                                                                 | <a href="http://www.sinovacbio.com/news/shownews.php?id=1126&amp;lang=en">http://www.sinovacbio.com/news/shownews.php?id=1126&amp;lang=en</a>                                 | 2020-06-24 | Zhuang, P. (2020, September 25). Coronavirus : WHO backed China's emergency use of experiment                                                             | <a href="https://www.scmp.com/news/china/society/article/3103121/coronavirus-who-backed-chinas-emergency-use-">https://www.scmp.com/news/china/society/article/3103121/coronavirus-who-backed-chinas-emergency-use-</a>                         | 2020-10-15 | Wee, S. (2020, October 16). A Chinese city says it has given some residents a vaccine. The New York Times.                  | <a href="https://www.nytimes.com/2020/10/16/world/a-chinese-city-says-it-has-given-some-residents-a-vaccine.html">https://www.nytimes.com/2020/10/16/world/a-chinese-city-says-it-has-given-some-residents-a-vaccine.html</a> | 2022-05-04 | Launch and Scale Speedometer: Vaccine Purchases | <a href="https://launchandscalefast.org/covid-19/vaccine-purchases">https://launchandscalefast.org/covid-19/vaccine-purchases</a> |

|                             |            |                                                                                                                                                                                                                                                                                                                            |                                                                                                                         |            |                                                                                              |                                                                                                                                                     |            |                                                                                                                            |                                                                                                                                                                                                                             |            |                                                                                                                                                                                                                                                                                                                         |                                                                                                                                           |
|-----------------------------|------------|----------------------------------------------------------------------------------------------------------------------------------------------------------------------------------------------------------------------------------------------------------------------------------------------------------------------------|-------------------------------------------------------------------------------------------------------------------------|------------|----------------------------------------------------------------------------------------------|-----------------------------------------------------------------------------------------------------------------------------------------------------|------------|----------------------------------------------------------------------------------------------------------------------------|-----------------------------------------------------------------------------------------------------------------------------------------------------------------------------------------------------------------------------|------------|-------------------------------------------------------------------------------------------------------------------------------------------------------------------------------------------------------------------------------------------------------------------------------------------------------------------------|-------------------------------------------------------------------------------------------------------------------------------------------|
|                             |            | Against COVID-19.                                                                                                                                                                                                                                                                                                          |                                                                                                                         |            | al vaccines, health official says. South China Morning Post.                                 | <a href="#">experimental</a>                                                                                                                        |            |                                                                                                                            |                                                                                                                                                                                                                             |            |                                                                                                                                                                                                                                                                                                                         |                                                                                                                                           |
| Bivalent Oral Polio Vaccine | 2005-10-13 | Kew, O. M., Sutter, R. W., de Gourville, E. M., et al. (2005). Vaccine-derived polioviruses and the endgame strategy for global polio eradication. Annual review of microbiology, 59, 587–635. <a href="https://doi.org/10.1146/annurev.micro.58.030603.123625">https://doi.org/10.1146/annurev.micro.58.030603.123625</a> | <a href="https://pubmed.ncbi.nlm.nih.gov/16153180/">https://pubmed.ncbi.nlm.nih.gov/16153180/</a>                       | 2009-10-09 | World Health Organization. Prequalified Vaccines - Vaccine Public Summary Assessment Report. | <a href="https://extranet.who.int/pqweb/content/polio-sabin-one-and-three-0">https://extranet.who.int/pqweb/content/polio-sabin-one-and-three-0</a> | 2009-12-15 | Harvard Medical School. (September 2018). Cases in Global Health Delivery: Chasing Polio Eradication: Vaccine Development. | <a href="https://www.globalhealthdelivery.org/files/ghd/files/ghd-043_polio_vaccine.pdf">https://www.globalhealthdelivery.org/files/ghd/files/ghd-043_polio_vaccine.pdf</a>                                                 | 2016-05-02 | Farrell M, Hampton LM, Shendale S, et al. Monitoring and Validation of the Global Replacement of tOPV with bOPV, April–May 2016, The Journal of Infectious Diseases, Volume 216, Issue suppl_1, 1 July 2017, Pages S193–S201, <a href="https://doi.org/10.1093/infdis/jiw558">https://doi.org/10.1093/infdis/jiw558</a> | <a href="https://academic.oup.com/jid/article/216/suppl_1/S193/3935039">https://academic.oup.com/jid/article/216/suppl_1/S193/3935039</a> |
| Ervebo                      | 2004-05-01 | Garbutt M, Liebscher R, Wahl Jensen V, et al. Properties of replication-competent vesicular stomatitis virus vectors                                                                                                                                                                                                       | <a href="https://www.ncbi.nlm.nih.gov/pmc/articles/PMC400370/">https://www.ncbi.nlm.nih.gov/pmc/articles/PMC400370/</a> | 2019-12-19 | USFDA. (19 December 2019). Approval Letter - ERVEBO.                                         | <a href="https://www.fda.gov/media/133757/download">https://www.fda.gov/media/133757/download</a>                                                   | 2018-07-01 | First FDA-approved vaccine for the prevention of Ebola virus disease, marking a critical milestone in public               | <a href="https://www.fda.gov/news-events/press-announcements/first-fda-approved-vaccine-prevention-ebola-virus-">https://www.fda.gov/news-events/press-announcements/first-fda-approved-vaccine-prevention-ebola-virus-</a> | #N/A       | #N/A                                                                                                                                                                                                                                                                                                                    | #N/A                                                                                                                                      |

|                               |            |                                                                                                                                                             |                                                                                                                                                     |            |                                                                                                |                                                                                                                                                                                                                                                                                                 |            |                                                                                                |                                                                                                                                                                                                                                                                   |            |                              |                                                                                                                                                                                                         |
|-------------------------------|------------|-------------------------------------------------------------------------------------------------------------------------------------------------------------|-----------------------------------------------------------------------------------------------------------------------------------------------------|------------|------------------------------------------------------------------------------------------------|-------------------------------------------------------------------------------------------------------------------------------------------------------------------------------------------------------------------------------------------------------------------------------------------------|------------|------------------------------------------------------------------------------------------------|-------------------------------------------------------------------------------------------------------------------------------------------------------------------------------------------------------------------------------------------------------------------|------------|------------------------------|---------------------------------------------------------------------------------------------------------------------------------------------------------------------------------------------------------|
|                               |            | expressing glycoproteins of filoviruses and arenaviruses. J Virol. 2004 May;78(10):5458-65. doi: 10.1128/jvi.78.10.5458-5465.2004.                          |                                                                                                                                                     |            |                                                                                                |                                                                                                                                                                                                                                                                                                 |            | health preparedness and response                                                               | <a href="#">disease-marking-critical-milestone-public-health</a>                                                                                                                                                                                                  |            |                              |                                                                                                                                                                                                         |
| Gardasil                      | 1993-07-01 | Caroline McNeil, Who Invented the VLP Cervical Cancer Vaccines?, JNCI: Journal of the National Cancer Institute, Volume 98, Issue 7, 5 April 2006, Page 433 | <a href="https://academic.oup.com/jnci/article/98/7/433/2522050?login=false">https://academic.oup.com/jnci/article/98/7/433/2522050?login=false</a> | 2006-03-01 | Gardasil FDA Approval History. Drugs.com                                                       | <a href="https://www.drugs.com/history/gardasil.html">https://www.drugs.com/history/gardasil.html</a>                                                                                                                                                                                           | 2007-07-01 | PATH                                                                                           | <a href="https://path.azureedge.net/media/documents/Global_Vaccine_Intro_Overview_Slides_Final_PATHwebsite_2021_AUG17_fx7_PZiH.pdf">https://path.azureedge.net/media/documents/Global_Vaccine_Intro_Overview_Slides_Final_PATHwebsite_2021_AUG17_fx7_PZiH.pdf</a> | 2018       | WHO HPV vaccination coverage | <a href="https://immunization.data.who.int/pages/coverage/hpv.html?CODE=Global&amp;ANTIGEN=&amp;YEAR=">https://immunization.data.who.int/pages/coverage/hpv.html?CODE=Global&amp;ANTIGEN=&amp;YEAR=</a> |
| Japanese Encephalitis Vaccine | 1954-07-01 | Yun SI, Lee YM. Japanese encephalitis: the virus and vaccines. Hum Vaccin Immunother. 2014;10(2):263-79. doi: 10.4161/hv.26902.                             | <a href="https://www.ncbi.nlm.nih.gov/pmc/articles/PMC4185882/">https://www.ncbi.nlm.nih.gov/pmc/articles/PMC4185882/</a>                           | 1988-07-01 | PATH. (August 2016). Combatting Japanese Encephalitis in Nepal: a public health success story. | <a href="https://media.path.org/documents/VAD_jepal_case_study_r1.pdf?gl=1*1hvzum9*gc_au*MJESODAxNzQyLjE2ODkyMTcwNDC.*ga*MTESNtyMiEONy4xNig5MjE3M">https://media.path.org/documents/VAD_jepal_case_study_r1.pdf?gl=1*1hvzum9*gc_au*MJESODAxNzQyLjE2ODkyMTcwNDC.*ga*MTESNtyMiEONy4xNig5MjE3M</a> | 1988-07-01 | PATH. (August 2016). Combatting Japanese Encephalitis in Nepal: a public health success story. | <a href="https://path.azureedge.net/media/documents/VAD_jepal_case_study_r1.pdf">https://path.azureedge.net/media/documents/VAD_jepal_case_study_r1.pdf</a>                                                                                                       | 2006-07-01 | WHO Global Health Database   | <a href="https://apps.who.int/immunization_monitoring/globalsummary/timeseries/tsc/coverage/jep.html">https://apps.who.int/immunization_monitoring/globalsummary/timeseries/tsc/coverage/jep.html</a>   |

|            |            |                                                                                                                                                                                                      |                                                                                                   |            |                                     |                                                                                                                                                                                                                                                                                                                                                                                                   |            |                                                                                       |                                                                                                                                                                                                                                                 |            |                                                                                                                                                                                                                                                                                                                                    |                                                                                                                           |
|------------|------------|------------------------------------------------------------------------------------------------------------------------------------------------------------------------------------------------------|---------------------------------------------------------------------------------------------------|------------|-------------------------------------|---------------------------------------------------------------------------------------------------------------------------------------------------------------------------------------------------------------------------------------------------------------------------------------------------------------------------------------------------------------------------------------------------|------------|---------------------------------------------------------------------------------------|-------------------------------------------------------------------------------------------------------------------------------------------------------------------------------------------------------------------------------------------------|------------|------------------------------------------------------------------------------------------------------------------------------------------------------------------------------------------------------------------------------------------------------------------------------------------------------------------------------------|---------------------------------------------------------------------------------------------------------------------------|
|            |            | Epub 2013 Oct 25.                                                                                                                                                                                    |                                                                                                   |            |                                     | <a href="#">DQ3* ga Y BSE7ZKDO M*MTY4QT lxNzA0Ny4x LjAuMTY4O TlxNzA0Ny 4ZMC4wLjA</a>                                                                                                                                                                                                                                                                                                              |            |                                                                                       |                                                                                                                                                                                                                                                 |            |                                                                                                                                                                                                                                                                                                                                    |                                                                                                                           |
| MenAfriVac | 2001-07-01 | Frasch CE, Preziosi MP, LaForce FM. Development of a group A meningococcal conjugate vaccine, MenAfriVac (TM). Hum Vaccin Immunother. 2012 Jun;8(6):715-24. doi: 10.4161/hv.19619. Epub 2012 Apr 12. | <a href="https://pubmed.ncbi.nlm.nih.gov/22495119/">https://pubmed.ncbi.nlm.nih.gov/22495119/</a> | 2009-12-01 | FDA                                 | <a href="https://www.fda.gov/files/vaccines%20&amp;%20biologics/published/The%20Role%20of%20the%20CBER%20in%20the%20Success%20against%20Epidemic%20Meningitis%20in%20Africa%20---%20MenAfriVac.pdf">https://www.fda.gov/files/vaccines%20&amp;%20biologics/published/The%20Role%20of%20the%20CBER%20in%20the%20Success%20against%20Epidemic%20Meningitis%20in%20Africa%20---%20MenAfriVac.pdf</a> | 2010-09-01 | Compaore, M. (30 November 2010). MenAfriVac, a long-awaited vaccine for Burkina Faso. | <a href="https://www.who.int/medicines/areas/quality_safety/regulation_legislation/cdra/wd-1_vaccine_BurkinaFaso.pdf?ua=1">https://www.who.int/medicines/areas/quality_safety/regulation_legislation/cdra/wd-1_vaccine_BurkinaFaso.pdf?ua=1</a> | 2011-07-01 | Bwaka, A., Bitá, A., Lingani, C., et al. (2019). Status of the Rollout of the Meningococcal Serogroup A Conjugate Vaccine in African Meningitis Belt Countries in 2018. The Journal of infectious diseases, 220(220 Suppl 4), S140–S147. <a href="https://doi.org/10.1093/infdis/jiz336">https://doi.org/10.1093/infdis/jiz336</a> | <a href="https://www.ncbi.nlm.nih.gov/pmc/articles/PMC6822965/">https://www.ncbi.nlm.nih.gov/pmc/articles/PMC6822965/</a> |
| nOPV2      | 2011-07-01 | Konopka-Anstadt, J. L., Campagnoli, R., Vincent, A., et al (2020). Development of a new oral                                                                                                         | <a href="https://doi.org/10.1038/s41541-020-0176-7">https://doi.org/10.1038/s41541-020-0176-7</a> | 2020-11-13 | Polio Global Eradication Initiative | <a href="https://polioeradication.org/wp-content/uploads/2022/06/nOPV2-requirements-overview-">https://polioeradication.org/wp-content/uploads/2022/06/nOPV2-requirements-overview-</a>                                                                                                                                                                                                           | 2021-03-01 | Duke Global Health Innovation Center. nOPV2 Intervention Research Interviews          | <a href="https://launchedscaleforaster.org/blog/nopv2">https://launchedscaleforaster.org/blog/nopv2</a>                                                                                                                                         | #N/A       | #N/A                                                                                                                                                                                                                                                                                                                               | #N/A                                                                                                                      |

|         |            |                                                                                                                                                                                                                       |                                                                                                 |            |                                                                                |                                                                                                                                                                                                                                                                     |            |                                                                                                                                     |                                                                                                                                                                                   |            |                               |                                                                                                                                                                                                                                                                                                                           |
|---------|------------|-----------------------------------------------------------------------------------------------------------------------------------------------------------------------------------------------------------------------|-------------------------------------------------------------------------------------------------|------------|--------------------------------------------------------------------------------|---------------------------------------------------------------------------------------------------------------------------------------------------------------------------------------------------------------------------------------------------------------------|------------|-------------------------------------------------------------------------------------------------------------------------------------|-----------------------------------------------------------------------------------------------------------------------------------------------------------------------------------|------------|-------------------------------|---------------------------------------------------------------------------------------------------------------------------------------------------------------------------------------------------------------------------------------------------------------------------------------------------------------------------|
|         |            | poliovirus vaccine for the eradication end game using codon deoptimization. <i>Npj Vaccines</i> , 5(1). doi:10.1038/s41541-020-0176-7                                                                                 |                                                                                                 |            |                                                                                | <a href="#">for-countries-pdf</a>                                                                                                                                                                                                                                   |            | (2021). Launch and Scale Speedometer. Duke University                                                                               |                                                                                                                                                                                   |            |                               |                                                                                                                                                                                                                                                                                                                           |
| RotaTeq | 1982-07-01 | Clark HF, Furukawa T, Bell LM, et al. Immune response of infants and children to low-passage bovine rotavirus (strain WC3). <i>Am J Dis Child</i> . 1986 Apr;140(4):350-6. doi: 10.1001/archpedi.1986.02140180084030. | <a href="https://pubmed.ncbi.nlm.nih.gov/3006476/">https://pubmed.ncbi.nlm.nih.gov/3006476/</a> | 2006-02-03 | U.S. Food and Drug Administration. February 3, 2006 Approval Letter - RotaTeq. | <a href="http://wayback.archive-it.org/7993/20170723031528/http://www.fda.gov/BiologicsBloodVaccines/ApprovedProducts/ucm142303.htm">http://wayback.archive-it.org/7993/20170723031528/http://www.fda.gov/BiologicsBloodVaccines/ApprovedProducts/ucm142303.htm</a> | 2006-10-27 | Gouveia M et al. (01 September 2010). RotaTeq: Progress toward Developing World Access. <i>The Journal of Infectious Diseases</i> . | <a href="https://academic.oup.com/jid/article/202/Supplement_1/S87/850802">https://academic.oup.com/jid/article/202/Supplement_1/S87/850802</a>                                   | 2015-07-01 | WHO Global Health Observatory | <a href="https://www.who.int/data/ghodata/indicators/indicator-details/GHO/rotavirus-vaccines-completed-dose-rotac-immunization-coverage-among-1-year-olds-(-)">https://www.who.int/data/ghodata/indicators/indicator-details/GHO/rotavirus-vaccines-completed-dose-rotac-immunization-coverage-among-1-year-olds-(-)</a> |
| Rotavac | 1993-11-01 | Das BK, Gentsch JR, Hoshino Y, et al. Characterization of the G serotype and genogroup of New Delhi newborn                                                                                                           | <a href="https://pubmed.ncbi.nlm.nih.gov/8212599/">https://pubmed.ncbi.nlm.nih.gov/8212599/</a> | 2014-01-20 | Central Drugs Standard Control Organisation                                    | <a href="https://cdsc.gov.in/opencms/resources/UploadCDSCOWEB/2018/UploadSmPC/8oral.pdf">https://cdsc.gov.in/opencms/resources/UploadCDSCOWEB/2018/UploadSmPC/8oral.pdf</a>                                                                                         | 2015-03-01 | PATH Center for Vaccine Innovation and Access. RotaFlash.                                                                           | <a href="https://www.path.org/programs/center-for-vaccine-innovation-and-access/rotaflash/">https://www.path.org/programs/center-for-vaccine-innovation-and-access/rotaflash/</a> | 2015-07-01 | WHO Global Health Observatory | <a href="https://www.who.int/data/ghodata/indicators/indicator-details/GHO/rotavirus-vaccines-completed-dose-rotac-">https://www.who.int/data/ghodata/indicators/indicator-details/GHO/rotavirus-vaccines-completed-dose-rotac-</a>                                                                                       |

|  |  |                                                                                       |  |  |  |  |  |  |  |  |  |                                                             |
|--|--|---------------------------------------------------------------------------------------|--|--|--|--|--|--|--|--|--|-------------------------------------------------------------|
|  |  | rotavirus strain 116E. Virology. 1993 Nov;197(1):99-107. doi: 10.1006/viro.1993.1570. |  |  |  |  |  |  |  |  |  | <a href="#">immunization-coverage-among-1-year-olds-(-)</a> |
|--|--|---------------------------------------------------------------------------------------|--|--|--|--|--|--|--|--|--|-------------------------------------------------------------|
